# Supplementary material
Source: PubMed Central journal article supplement (PMC8054731)
Supplement: sj-pdf-1-jcb-10.1177_0271678X20935171.pdf [file sj-pdf-1-jcb-10.1177_0271678X20935171.pdf]

## Supplementary Material

### Lateralized CBF analyses

The 10 ROIs (left and right hippocampus, IPL, ITG, mOFC, and rMFG) were entered into a MANCOVA simultaneously that adjusted for age, sex, APOE  $\epsilon$ 4 status, pulse pressure, FDG PET, and precentral gyrus CBF. Univariate tests are shown in Supplemental Table 1 and least significant difference pairwise are shown in Supplemental Figure 1.

Supplemental Table 1. Lateralized ROI univariate tests

| ROI               | F    | p           | $\eta_p^2$ |
|-------------------|------|-------------|------------|
| Left Hippocampus  | 3.93 | <b>.022</b> | .049       |
| Right Hippocampus | 3.40 | <b>.036</b> | .042       |
| Left IPL          | 2.25 | .109        | .029       |
| Right IPL         | 2.54 | .082        | .032       |
| Left ITG          | 4.64 | <b>.011</b> | .057       |
| Right ITG         | 5.31 | <b>.006</b> | .065       |
| Left mOFC         | 2.06 | .131        | .026       |
| Right mOFC        | 1.24 | .292        | .016       |
| Left rMFG         | 1.11 | .333        | .014       |
| Right rMFG        | 0.32 | .727        | .004       |

IPL=inferior parietal lobe, ITG=inferior temporal gyrus, mOFC=medial orbitofrontal cortex, rMFG=rostral middle frontal gyrus.

**Supplemental Figure 1.** CBF by cognitive group across lateralized a priori regions of interest

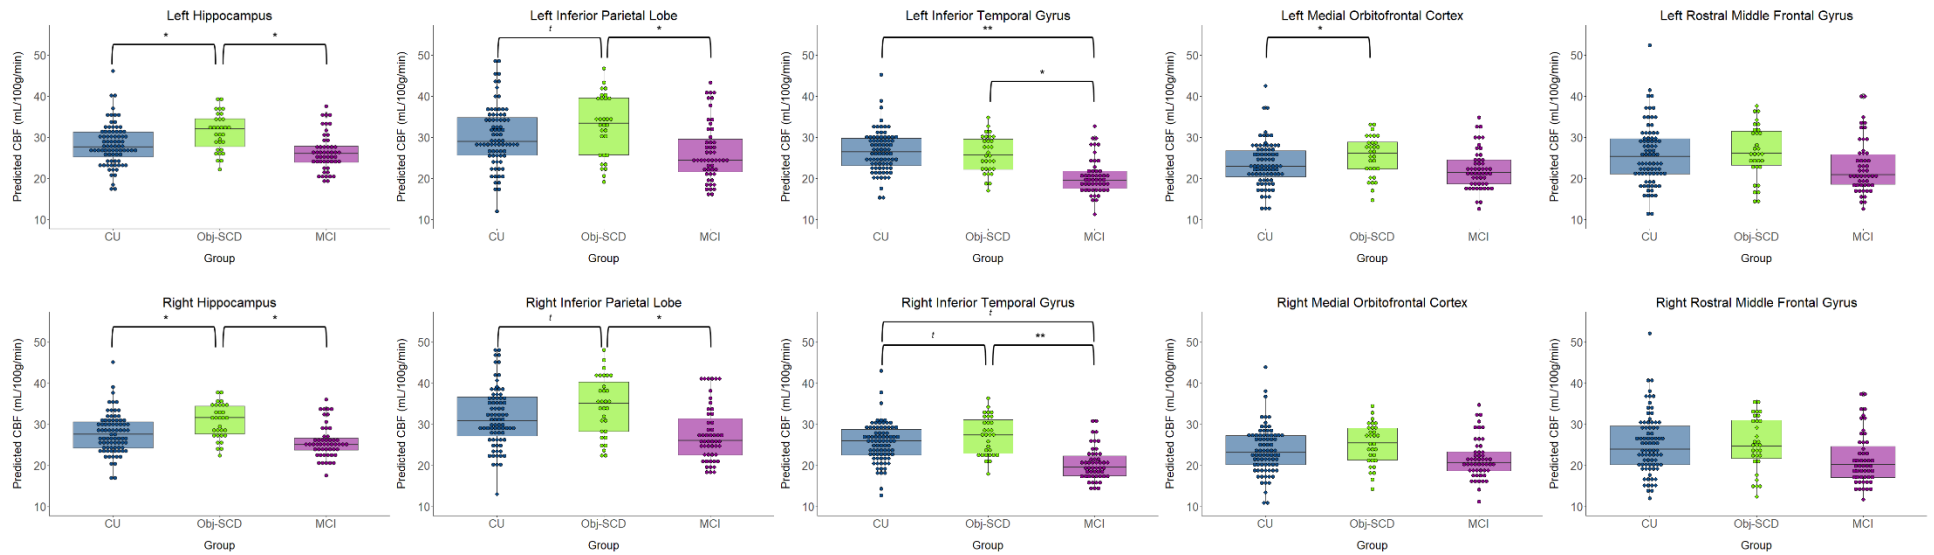

$t < .1$ , \* $p < .05$ , \*\* $p < .01$ . Model predicted CBF was adjusted for age, sex, APOE  $\epsilon 4$  status, pulse pressure, FDG PET, and precentral gyrus CBF. CBF=Cerebral Blood Flow; CU=Cognitively unimpaired; Obj-SCD=Objectively-defined subtle cognitive decline; MCI=Mild cognitive impairment.

## Exploratory analyses.

Pairwise comparisons of regional CBF in p-tau/A $\beta$  positive participants by group are shown in Supplemental Figure 2. There were no significant pairwise differences in regional CBF by group in participants who were p-tau/A $\beta$  negative.

**Supplemental Figure 2.** Pairwise comparisons of regional CBF in p-tau/A $\beta$  positive participants by group.

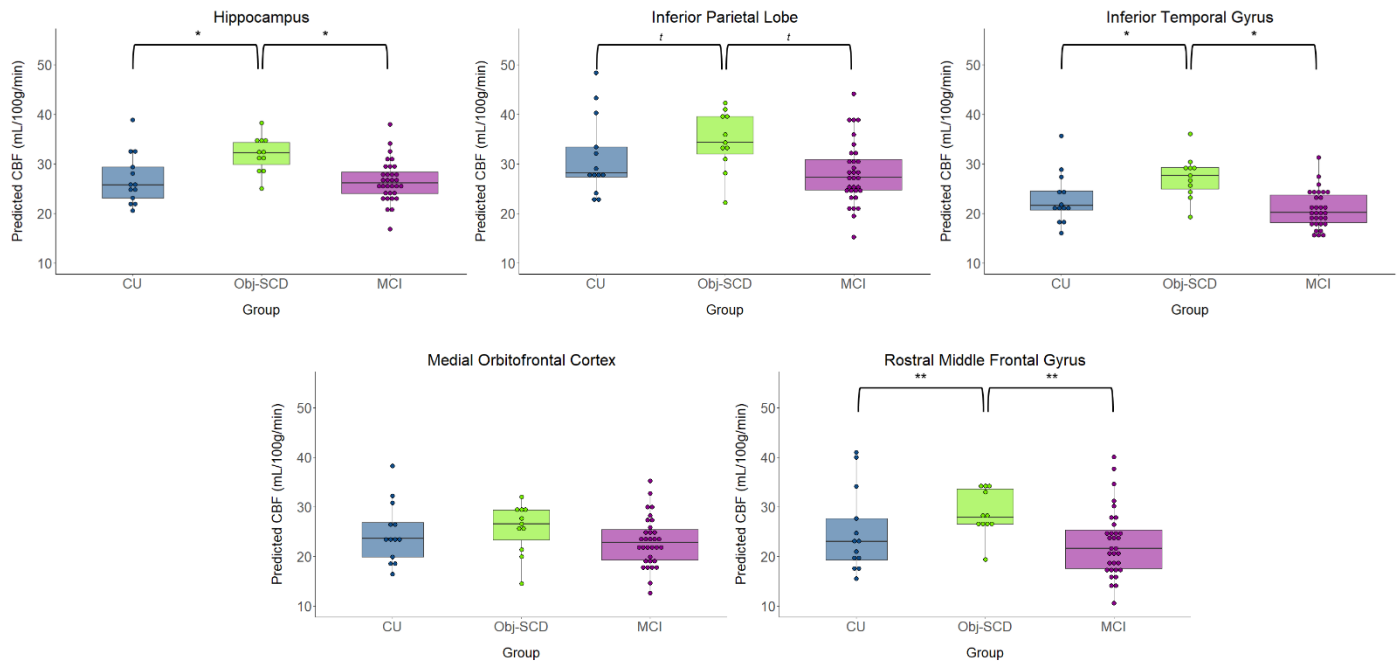

$t < 1$ , \* $p < .05$ , \*\* $p < .01$ . Model predicted CBF was adjusted for age, sex, APOE  $\epsilon 4$  status, pulse pressure, FDG PET, and precentral gyrus CBF. CBF=Cerebral Blood Flow; CU=Cognitively unimpaired; Obj-SCD=Objectively-defined subtle cognitive decline; MCI=Mild cognitive impairment.
